# Supplementary material for: Cannabinoid antagonist SLV326 induces convulsive seizures and changes in the interictal EEG in rats
Source: PLoS One. 2017 Feb 2;12(2):e0165363. doi: 10.1371/journal.pone.0165363 (PMC5289424; doi:10.1371/journal.pone.0165363)
Supplement: S1 File — In this video a representative seizure can be seen. Note the rigid tail and kangaroo pose of the animal, as well as the clonus of the forelimbs. (ZIP) [file pone.0165363.s002.zip]

Archive with 2 entries (2 files):
- SLVseizure2.avi
- SLVseizure1.avi
